# Supplementary material
Source: publisher figshare collection journal article supplement (https://sage.figshare.com/ndownloader/files/18737123)
Supplement: Supplementary file 1 [file 18737123]

Reviewer 2 v.1

Comments to the Author

General Comments

Overall the paper is well-written.

Specific Comments

Page4, line 53. Change " eight patients combined" to "eight patients with combined"
